# Supplementary material for: The full-length transcriptome of C. elegans using direct RNA sequencing
Source: Genome Res. 2020 Feb;30(2):299–312. doi: 10.1101/gr.251314.119 (PMC7050520; doi:10.1101/gr.251314.119)
Supplement: Supplemental Material [file supp_gr.251314.119_Supplemental_Table_S1.xlsx]

## Sheet: SupplementalTable1
			Passing Reads
Sample	Technical replicate	Processing Failed Reads	Passing Basecalled Reads	Total bases (Mb)	Mean per base quality	Median per base quality of passing reads	Mean Read Length	Median Read Length	Maximum read length	Average percent reference identity	Median percent reference identity
L1	1	175018	232292	174.68	10.28	9	752	573	69152	86.6	87
	2	253154	590372	473.97	10.29	9	803	606	27301	85.9	86.4
L2	1	86743	80499	61.47	10.18	9	764	595	46597	86.6	87
	2	315376	689242	550.85	10.32	10	799	619	25916	86.4	86.8
L3	1	151036	238012	179.1	10.35	10	752	598	14999	86.8	87.2
	2	352555	573238	446.8	10.38	10	779	611	30650	86.5	86.9
L4	1	169621	319912	247.17	10.31	10	773	611	40667	86.6	87
	2	97811	220286	162.76	10.29	10	739	594	12722	85.6	86
Young Adult	1	209212	957639	894.67	10.29	9	934	687	32031	86.1	86.5
	2	15671	82283	72.03	10.83	10	875	653	13749	86.9	87.4
Adult	1	61794	232515	210.68	10.68	10	906	649	12834	85.5	86
	2	153899	535939	472.46	10.59	10	882	637	28436	85.9	86.4
Male	1	252924	415187	323.75	10.24	9	780	595	20276	86.8	87.2
	2	135821	373567	279.61	10.54	10	748	574	14666	85.3	85.7
Total		2430635	5540983	4549.99
Supplemental Table 1 – Summary of sequencing statistics for each replicate of stage sequenced.
