# Supplementary material for: The full-length transcriptome of C. elegans using direct RNA sequencing
Source: Genome Res. 2020 Feb;30(2):299–312. doi: 10.1101/gr.251314.119 (PMC7050520; doi:10.1101/gr.251314.119)
Supplement: Supplemental Material [file supp_gr.251314.119_Supplemental_Table_S2.xlsx]

## Sheet: SupplementalTable2
Sample	Technical replicate	Passing Basecalled Reads	Genome Aligned	Quality Alignment	polyA QC filtered	Stringent start site filtered
L1	1	232292	202914	187805	164289	129345
	2	590372	511700	464882	421063	326320
L2	1	80499	68715	62989	55325	44130
	2	689242	584995	536897	492027	383579
L3	1	238012	212362	197020	176305	141076
	2	573238	489020	451054	416917	321872
L4	1	319912	283506	260326	231684	180860
	2	220286	190898	175526	160739	125884
Young Adult	1	957639	870697	782843	674306	521411
	2	82283	76089	71284	67399	48903
Adult	1	232515	206706	191937	182580	122567
	2	535939	482143	443412	416133	296425
Male	1	415187	360695	329442	284699	199605
	2	373567	325873	300096	283288	180525
Sample		Passing Basecalled Reads	Genome Aligned	Quality Alignment	% Remaining	polyA QC filtered	% Remaining	start site filtered	% Remaining	Non-corrected	Corrected	Post-correction	% Remaining	Post Intron Filter	% Remaining	Three prime filter	% Remaining
L1		822664	714614	652687	91.3342	585352	81.9116	455665	63.7638	403611	33670	437281	61.1912	432668	60.5457	428580	59.9736
L2		769741	653710	599886	91.7664	547352	83.7301	427709	65.4279	383303	31103	414406	63.3929	410676	62.8224	407491	62.3351
L3		811250	701382	648074	92.3996	593222	84.579	462948	66.0051	415005	32180	447185	63.7577	443221	63.1925	439276	62.6301
L4		540198	474404	435852	91.8736	392423	82.7192	306744	64.6588	275282	21597	296879	62.5794	294445	62.0663	291801	61.509
Young Adult		1039922	946786	854127	90.2133	741705	78.3392	570314	60.2368	505834	45687	551521	58.2519	543711	57.427	538385	56.8645
Adult		768454	688849	635349	92.2334	598713	86.915	418992	60.8249	370721	34050	404771	58.7605	400342	58.1175	397505	57.7057
Male		788754	686568	629538	91.6935	567987	82.7284	380130	55.3667	338468	27627	366095	53.3225	362136	52.7458	356248	51.8882
Total		5540983	4866313	4455513	91.5583	4026754	82.7475	3022502	62.1107	2692224	225914	2918138	59.9661	2887199	59.3303	2859286	58.7567
Supplemental Table 2 – Number of reads remaining in each stage sequenced after each filtering step applied.
