# Supplementary material for: The full-length transcriptome of C. elegans using direct RNA sequencing
Source: Genome Res. 2020 Feb;30(2):299–312. doi: 10.1101/gr.251314.119 (PMC7050520; doi:10.1101/gr.251314.119)
Supplement: Supplemental Material [file supp_gr.251314.119_Supplemental_Table_S3.xlsx]

## Sheet: Sheet1
developmental stage	splice isoforms	genes	previously annotated isoforms	genes with previously annotated isoforms	novel isoforms	genes with novel isoforms	utrs	novel utrs	genes with novel utrs	full length isoforms
L1	12295	9421	11441	9196	854	657	10991	1293	1117	14546
L2	12583	9657	11678	9429	905	708	11288	1343	1152	14916
L3	12427	9749	11615	9538	812	663	11354	1360	1168	14801
L4	10697	8858	10108	8640	589	489	10018	1131	985	12551
young adult	13905	10179	12721	9946	1184	879	12418	1637	1418	16857
mature adult	12559	9241	11594	9028	965	753	11238	1409	1225	15101
male	14573	11339	13524	11064	1049	845	12644	1644	1459	17137
all	23865	14611	20413	14189	3452	2251	16342	2640	2221	28858
Supplemental Table 3 – Number of splice isoforms, genes, UTRs, full-length isoforms, etc, identified in each stage sequenced and across all stages sequenced.
