# Supplementary material for: The full-length transcriptome of C. elegans using direct RNA sequencing
Source: Genome Res. 2020 Feb;30(2):299–312. doi: 10.1101/gr.251314.119 (PMC7050520; doi:10.1101/gr.251314.119)
Supplement: Supplemental Material [file supp_gr.251314.119_Supplemental_Table_S4.xlsx]

## Sheet: SupplementalTable4
Stage	Genes with significant correlation between 3' UTR and splice isoform
L1	2
L2	1
L3	5
L4	2
young adult	9
mature adult	9
male	10
Supplemental Table 4 – Number of genes at which there was statistically significant correlation (by Fisher’s Exact test) between splice isoform and 3’UTR isoform in each stage sequenced.
