# Supplementary material for: The full-length transcriptome of C. elegans using direct RNA sequencing
Source: Genome Res. 2020 Feb;30(2):299–312. doi: 10.1101/gr.251314.119 (PMC7050520; doi:10.1101/gr.251314.119)
Supplement: Supplemental Material [file supp_gr.251314.119_Supplemental_Table_S6.xlsx]

## Sheet: Sheet1
SRA Accession Numbers	Developmental Stage	Citation
SRR016679	L1	Hillier LW, Reinke V, Green P, Hirst M, Marra MA, Waterston RH. 2009. Massively parallel sequencing of the polyadenylated transcriptome of C. elegans. Genome Res 19: 657–666.
SRR016680	L1	Hillier LW, Reinke V, Green P, Hirst M, Marra MA, Waterston RH. 2009. Massively parallel sequencing of the polyadenylated transcriptome of C. elegans. Genome Res 19: 657–666.
SRR016681	L1	Hillier LW, Reinke V, Green P, Hirst M, Marra MA, Waterston RH. 2009. Massively parallel sequencing of the polyadenylated transcriptome of C. elegans. Genome Res 19: 657–666.
SRR016683	L1	Hillier LW, Reinke V, Green P, Hirst M, Marra MA, Waterston RH. 2009. Massively parallel sequencing of the polyadenylated transcriptome of C. elegans. Genome Res 19: 657–666.
SRR089821	L1	Hillier LW, Reinke V, Green P, Hirst M, Marra MA, Waterston RH. 2009. Massively parallel sequencing of the polyadenylated transcriptome of C. elegans. Genome Res 19: 657–666.
SRR089822	L1	Hillier LW, Reinke V, Green P, Hirst M, Marra MA, Waterston RH. 2009. Massively parallel sequencing of the polyadenylated transcriptome of C. elegans. Genome Res 19: 657–666.
SRR089823	L1	Hillier LW, Reinke V, Green P, Hirst M, Marra MA, Waterston RH. 2009. Massively parallel sequencing of the polyadenylated transcriptome of C. elegans. Genome Res 19: 657–666.
SRR006511	L2	Hillier LW, Reinke V, Green P, Hirst M, Marra MA, Waterston RH. 2009. Massively parallel sequencing of the polyadenylated transcriptome of C. elegans. Genome Res 19: 657–666.
SRR006512	L2	Hillier LW, Reinke V, Green P, Hirst M, Marra MA, Waterston RH. 2009. Massively parallel sequencing of the polyadenylated transcriptome of C. elegans. Genome Res 19: 657–666.
SRR006513	L2	Hillier LW, Reinke V, Green P, Hirst M, Marra MA, Waterston RH. 2009. Massively parallel sequencing of the polyadenylated transcriptome of C. elegans. Genome Res 19: 657–666.
SRR006514	Young adult	Hillier LW, Reinke V, Green P, Hirst M, Marra MA, Waterston RH. 2009. Massively parallel sequencing of the polyadenylated transcriptome of C. elegans. Genome Res 19: 657–666.
SRR006515	Young adult	Hillier LW, Reinke V, Green P, Hirst M, Marra MA, Waterston RH. 2009. Massively parallel sequencing of the polyadenylated transcriptome of C. elegans. Genome Res 19: 657–666.
SRR006516	Young adult	Hillier LW, Reinke V, Green P, Hirst M, Marra MA, Waterston RH. 2009. Massively parallel sequencing of the polyadenylated transcriptome of C. elegans. Genome Res 19: 657–666.
SRR006517	L4	Hillier LW, Reinke V, Green P, Hirst M, Marra MA, Waterston RH. 2009. Massively parallel sequencing of the polyadenylated transcriptome of C. elegans. Genome Res 19: 657–666.
SRR006518	L4	Hillier LW, Reinke V, Green P, Hirst M, Marra MA, Waterston RH. 2009. Massively parallel sequencing of the polyadenylated transcriptome of C. elegans. Genome Res 19: 657–666.
SRR006519	L3	Hillier LW, Reinke V, Green P, Hirst M, Marra MA, Waterston RH. 2009. Massively parallel sequencing of the polyadenylated transcriptome of C. elegans. Genome Res 19: 657–666.
SRR006520	L3	Hillier LW, Reinke V, Green P, Hirst M, Marra MA, Waterston RH. 2009. Massively parallel sequencing of the polyadenylated transcriptome of C. elegans. Genome Res 19: 657–666.
SRR125337	L2	Hillier LW, Reinke V, Green P, Hirst M, Marra MA, Waterston RH. 2009. Massively parallel sequencing of the polyadenylated transcriptome of C. elegans. Genome Res 19: 657–666.
SRR125338	L2	Hillier LW, Reinke V, Green P, Hirst M, Marra MA, Waterston RH. 2009. Massively parallel sequencing of the polyadenylated transcriptome of C. elegans. Genome Res 19: 657–666.
SRR125339	L2	Hillier LW, Reinke V, Green P, Hirst M, Marra MA, Waterston RH. 2009. Massively parallel sequencing of the polyadenylated transcriptome of C. elegans. Genome Res 19: 657–666.
SRR089405	L3	Hillier LW, Reinke V, Green P, Hirst M, Marra MA, Waterston RH. 2009. Massively parallel sequencing of the polyadenylated transcriptome of C. elegans. Genome Res 19: 657–666.
SRR089406	L3	Hillier LW, Reinke V, Green P, Hirst M, Marra MA, Waterston RH. 2009. Massively parallel sequencing of the polyadenylated transcriptome of C. elegans. Genome Res 19: 657–666.
SRR089407	L3	Hillier LW, Reinke V, Green P, Hirst M, Marra MA, Waterston RH. 2009. Massively parallel sequencing of the polyadenylated transcriptome of C. elegans. Genome Res 19: 657–666.
SRR023579	L4	Hillier LW, Reinke V, Green P, Hirst M, Marra MA, Waterston RH. 2009. Massively parallel sequencing of the polyadenylated transcriptome of C. elegans. Genome Res 19: 657–666.
SRR023580	L4	Hillier LW, Reinke V, Green P, Hirst M, Marra MA, Waterston RH. 2009. Massively parallel sequencing of the polyadenylated transcriptome of C. elegans. Genome Res 19: 657–666.
SRR023581	L4	Hillier LW, Reinke V, Green P, Hirst M, Marra MA, Waterston RH. 2009. Massively parallel sequencing of the polyadenylated transcriptome of C. elegans. Genome Res 19: 657–666.
SRR125481	Young adult	Hillier LW, Reinke V, Green P, Hirst M, Marra MA, Waterston RH. 2009. Massively parallel sequencing of the polyadenylated transcriptome of C. elegans. Genome Res 19: 657–666.
SRR125482	Young adult	Hillier LW, Reinke V, Green P, Hirst M, Marra MA, Waterston RH. 2009. Massively parallel sequencing of the polyadenylated transcriptome of C. elegans. Genome Res 19: 657–666.
SRR5024015	Mature adult	Weiser NE, Yang DX, Feng S, Kalinava N, Brown KC, Khanikar J, Freeberg MA, Snyder MJ, Csankovszki G, Chan RC, et al. 2017. MORC-1 Integrates Nuclear RNAi and Transgenerational Chromatin Architecture to Promote Germline Immortality. Dev Cell 41: 408–423.e7.
SRR5024016	Mature adult	Weiser NE, Yang DX, Feng S, Kalinava N, Brown KC, Khanikar J, Freeberg MA, Snyder MJ, Csankovszki G, Chan RC, et al. 2017. MORC-1 Integrates Nuclear RNAi and Transgenerational Chromatin Architecture to Promote Germline Immortality. Dev Cell 41: 408–423.e7.
SRR1056307	Male	Albritton SE, Kranz A-L, Rao P, Kramer M, Dieterich C, Ercan S. 2014. Sex-biased gene expression and evolution of the x chromosome in nematodes. Genetics 197: 865–883.
SRR1056308	Male	Albritton SE, Kranz A-L, Rao P, Kramer M, Dieterich C, Ercan S. 2014. Sex-biased gene expression and evolution of the x chromosome in nematodes. Genetics 197: 865–883.
SRR1056309	Male	Albritton SE, Kranz A-L, Rao P, Kramer M, Dieterich C, Ercan S. 2014. Sex-biased gene expression and evolution of the x chromosome in nematodes. Genetics 197: 865–883.
SRR1056310	Male	Albritton SE, Kranz A-L, Rao P, Kramer M, Dieterich C, Ercan S. 2014. Sex-biased gene expression and evolution of the x chromosome in nematodes. Genetics 197: 865–883.
SRR1056311	Male	Albritton SE, Kranz A-L, Rao P, Kramer M, Dieterich C, Ercan S. 2014. Sex-biased gene expression and evolution of the x chromosome in nematodes. Genetics 197: 865–883.
SRR1056312	Male	Albritton SE, Kranz A-L, Rao P, Kramer M, Dieterich C, Ercan S. 2014. Sex-biased gene expression and evolution of the x chromosome in nematodes. Genetics 197: 865–883.
SRR1056313	Male	Albritton SE, Kranz A-L, Rao P, Kramer M, Dieterich C, Ercan S. 2014. Sex-biased gene expression and evolution of the x chromosome in nematodes. Genetics 197: 865–883.
SRR1056314	Male	Albritton SE, Kranz A-L, Rao P, Kramer M, Dieterich C, Ercan S. 2014. Sex-biased gene expression and evolution of the x chromosome in nematodes. Genetics 197: 865–883.
Supplemental Table 6 – The SRA Accession numbers, developmental stages, and corresponding citations for the Illumina RNAseq data used to generate a transcriptome assembly using StringTie2.
